# Supplementary material for: Flexible polymer solar cells with power conversion efficiency of 8.7%
Source: Royal Society of Chemistry journal article supplement (doi:10.1039/c3tc32520b), 2014-01-01
Supplement: c3tc32520b1.pdf [file c3tc32520b1.pdf]

## Supporting Information

### Flexible Polymer Solar Cells with Power Conversion Efficiency of 8.7%

**Baofeng Zhao<sup>1</sup>, Zhicai He<sup>1</sup>, Xiaoping Cheng,<sup>1</sup> Donghuan Qin<sup>1</sup>, Min Yun<sup>2</sup>,  
Meijuan Wang<sup>2</sup>, Xiaodong Huang<sup>2</sup>, Jianguo Wu<sup>2</sup>, Hongbin Wu<sup>1\*</sup>, Yong Cao<sup>1</sup>**

<sup>1</sup> Institute of Polymer Optoelectronic Materials and Devices, State Key Laboratory of Luminescent Materials and Devices, South China University of Technology, Guangzhou 510640, P. R. China

\*e-mail: [hbwu@scut.edu.cn](mailto:hbwu@scut.edu.cn)

<sup>2</sup> National Center of Supervision & Inspection on Solar Photovoltaic Products Quality, Innovation & Creation Science Park, Suit A-10F, No 5 Xinhua Road, Wuxi 214028, P. R. China

The sheet resistance of the PET/ITO as a function of bending angle and bending cycle test for a typical PTB7 devices (after storing in N<sub>2</sub> atmosphere for 150 days)

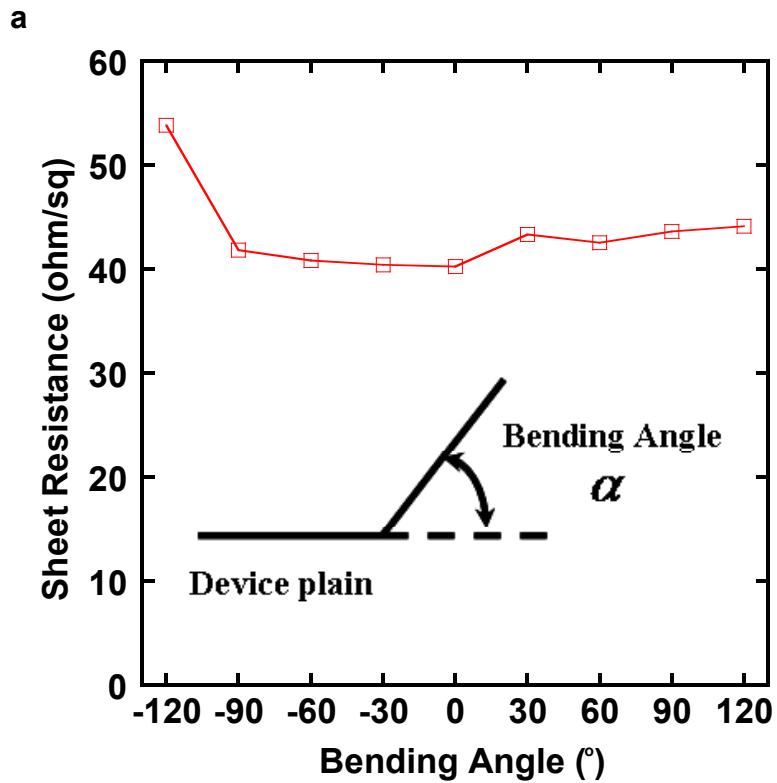

**Figure S1. a)** the sheet resistance of the PET/ITO under different bending conditions. Note that the unfolded substrate showed a sheet resistance of 40 ohm/square.

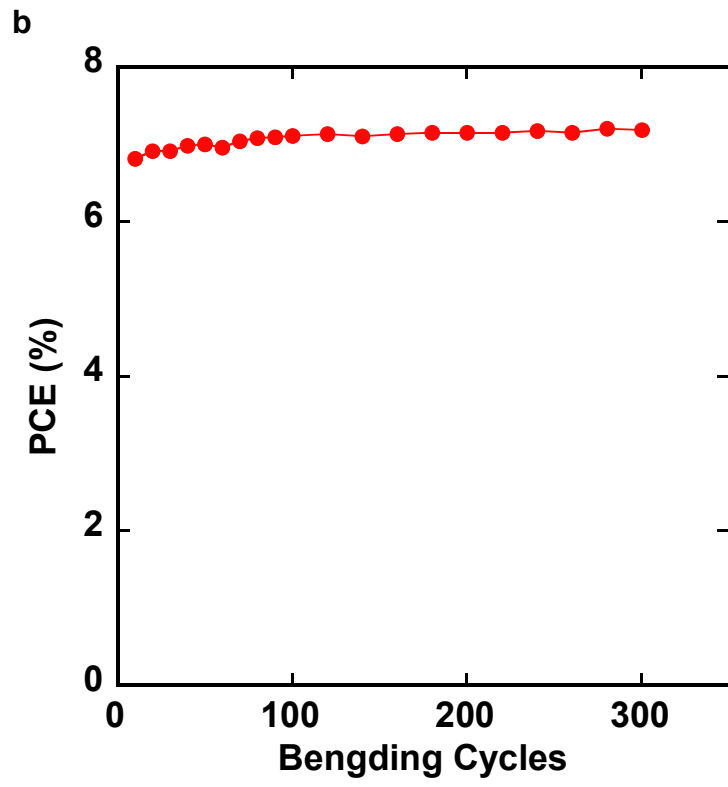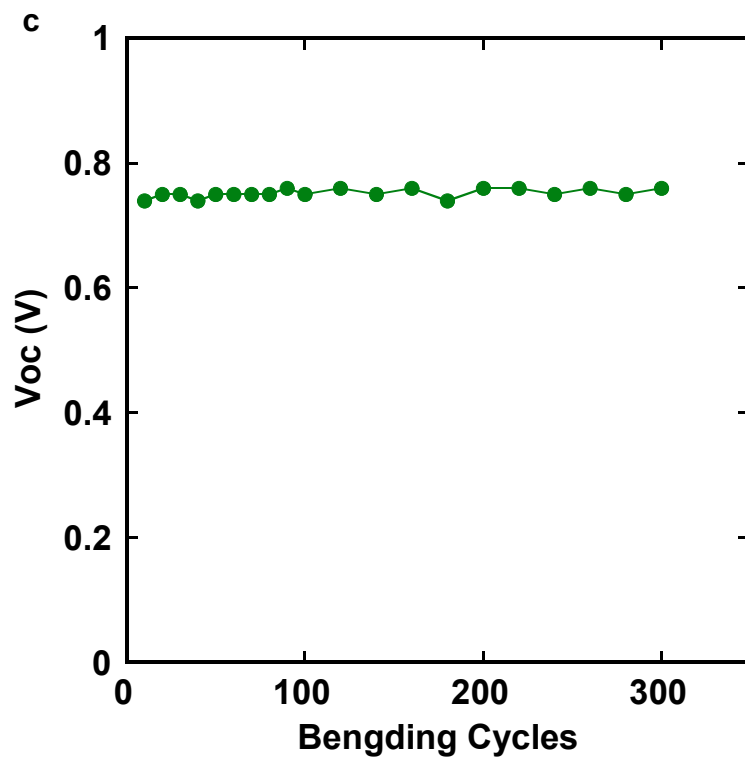

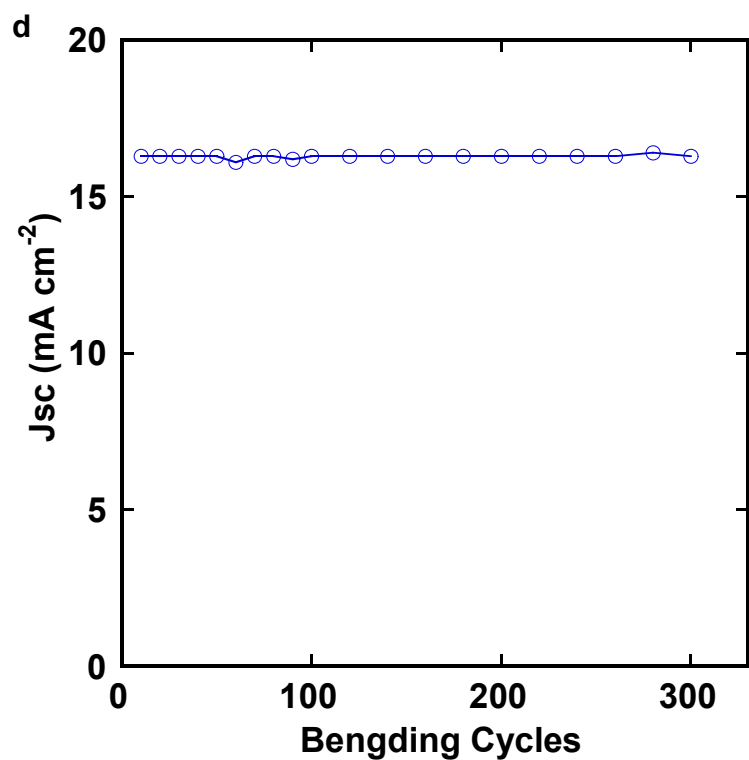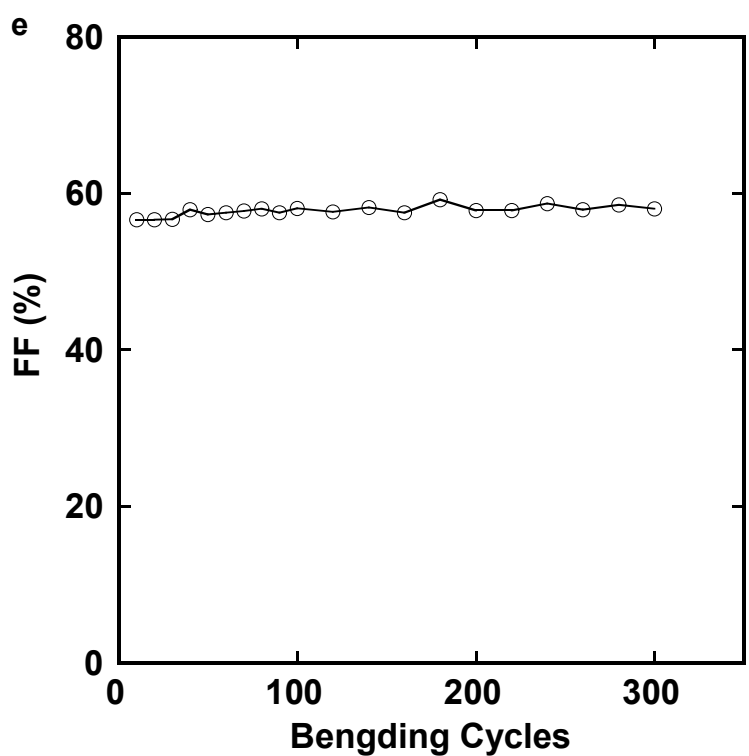

**Figure S1. b)~e).** The PCE (b), Voc (c), Jsc (d) and FF (e) of the a typical PTB7 devices (stored in N<sub>2</sub> atmosphere for 150 days) for as a function of bending cycles at fixed bending angle of 30 °.

***J-V* characteristics and performance parameters of a typical flexible Device 2 during shelf storage**

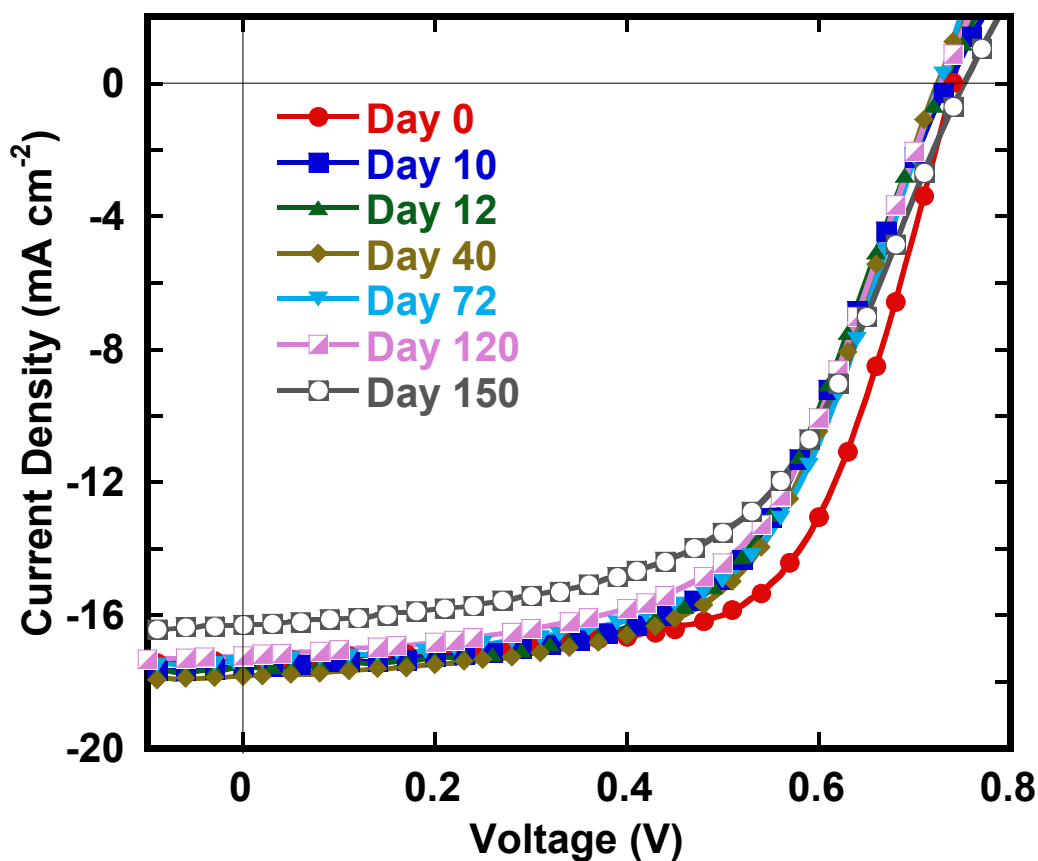

**Figure S2.** The *J-V* characteristics of a typical flexible Device 2 obtained during shelf storage period.

**Table S2.** Device performance parameters of a typical Device 2 tested during different shelf storage period.

| Days | Voc<br>[V] | Jsc<br>[mA cm <sup>-2</sup> ] | FF<br>[%] | PCE<br>[%] |
|------|------------|-------------------------------|-----------|------------|
| 0    | 0.74       | 17.4                          | 64.4      | 8.28       |
| 10   | 0.74       | 17.5                          | 57.6      | 7.47       |
| 12   | 0.73       | 17.6                          | 57.9      | 7.45       |
| 40   | 0.72       | 17.8                          | 59.5      | 7.64       |
| 72   | 0.73       | 17.4                          | 59.3      | 7.53       |
| 120  | 0.72       | 17.2                          | 58.4      | 7.24       |
| 150  | 0.75       | 16.3                          | 55.9      | 6.83       |

***J-V* characteristics and performance parameters of a typical flexible  
Device 2 upon thermal annealing**

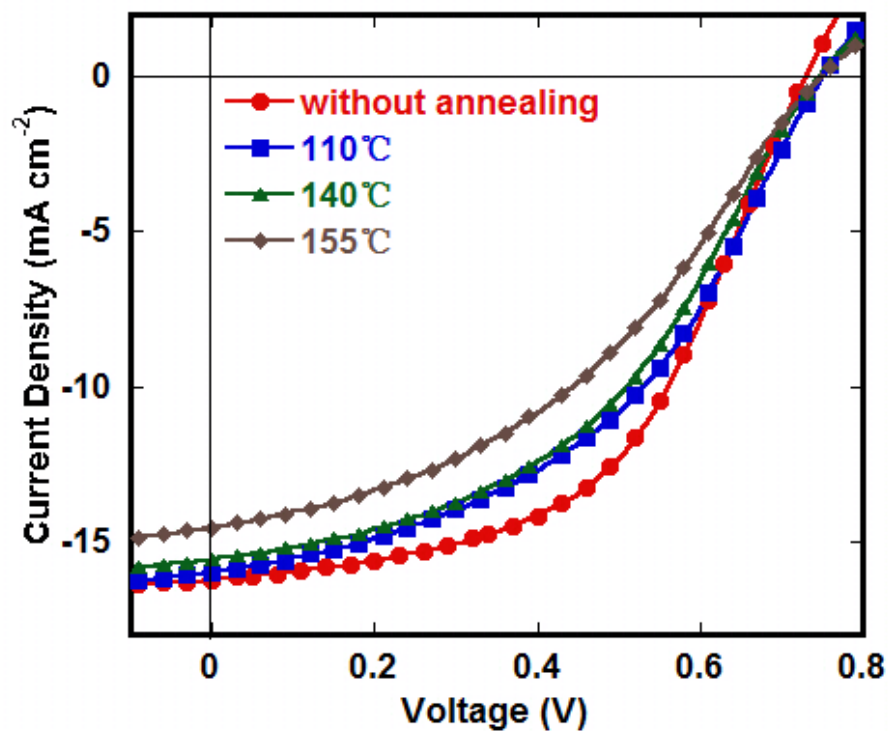

**Figure S3.** The *J-V* characteristics of a typical device 2 after 110, 140 and 155°C annealing for 10 min.

**Table S3.** Device performance parameters of a typical Device 2 (after storage for more than 150 days)

| Post-thermal annealing | Voc  | Jsc                    | FF   | PCE  |
|------------------------|------|------------------------|------|------|
|                        | [V]  | [mA cm <sup>-2</sup> ] | [%]  | [%]  |
| N.A.                   | 0.73 | 16.2                   | 52.1 | 6.17 |
| 110°C 10 min           | 0.75 | 16                     | 45.2 | 5.42 |
| 140°C 10 min           | 0.75 | 15.5                   | 44.6 | 5.20 |
| 155°C 10 min           | 0.75 | 14.9                   | 43.6 | 4.88 |
